# Supplementary material
Source: PubMed Central journal article supplement (PMC5544505)
Supplement: CJN.01420217SupplementaryData.pdf [file CJN.01420217SupplementaryData.pdf]

**Supplemental Table 1.** Baseline characteristics by reported low bone density (1995)

|                                               | No low bone density<br>(N=73,633) | Low bone density<br>(N=422) |
|-----------------------------------------------|-----------------------------------|-----------------------------|
| Age (years)                                   | 40 (5)                            | 43 (4)                      |
| Race, white                                   | 71,237 (97%)                      | 410 (97%)                   |
| Body mass index (kg/m <sup>2</sup> )          | 25.6 (5.8)                        | 24.2 (5.7)                  |
| Post-Menopausal                               | 5,557 (8%)                        | 119 (28%)                   |
| History of hypertension                       | 6,962 (9%)                        | 42 (10%)                    |
| History of diabetes                           | 833 (1%)                          | 11 (3%)                     |
| Family history of kidney stones               | 10,400 (14%)                      | 70 (17%)                    |
| Thiazide use                                  | 1,725 (2%)                        | 12(3%)                      |
| Fluid intake (L/day)                          | 2.0 (0.8)                         | 1.9 (0.8)                   |
| Dietary calcium intake (mg/day)               | 839 (402)                         | 801 (398)                   |
| Dietary potassium intake (mg/day)             | 3,121 (1044)                      | 3,114 (1046)                |
| Supplemental calcium (mg/d) median (25%, 75%) | 0 (0, 200)                        | 0 (0, 200)                  |
| Total vitamin D intake (IU)                   | 371 (254)                         | 407 (303)                   |

Abbreviations: SD, standard deviation

\*Data are presented as N (%) unless otherwise indicated. Dietary intake and urinary factors are presented as mean and standard deviation (SD) unless otherwise indicated.

**Supplemental Table 2.** Multivariable adjusted differences in 24-hour oxalate excretion, citrate excretion, calcium oxalate relative supersaturation for participants with history of low bone density who were on a bisphosphonate (N=68) compared with participants who were not on a bisphosphonate (N=390)

| 24-hour urinary parameter                             | Difference | 95% CI         | P    |
|-------------------------------------------------------|------------|----------------|------|
| Oxalate excretion <sup>a</sup>                        | -1 mg/day  | -3, 2 mg/day   | 0.66 |
| Citrate excretion <sup>b</sup>                        | 22 mg/day  | -38, 83 mg/day | 0.47 |
| Calcium oxalate relative supersaturation <sup>c</sup> | 0.35       | -0.46, 1.15    | 0.40 |

<sup>a</sup>Age, body mass index, thiazide use, supplemental calcium intake, dietary calcium intake, total vitamin D intake, menopausal status, 24-hour urinary factors (volume, sodium, magnesium, citrate, potassium, sulfate, phosphorus, creatinine)

<sup>b</sup>Age, body mass index, thiazide use, supplemental calcium intake, dietary calcium intake, total vitamin D intake, menopausal status, 24-hour urinary factors (volume, sodium, magnesium, potassium, sulfate, phosphorus, creatinine)

<sup>c</sup>Age, body mass index, thiazide use, supplemental calcium intake, dietary calcium intake, total vitamin D intake, menopausal status, 24-hour urinary factors (sodium, magnesium, potassium, sulfate, phosphorus, creatinine)
